# Supplementary material
Source: Elsevier journal article supplement (https://www.sciencedirect.com/science/article/pii/S0213616321000264)
Supplement: mmc1 [file S0213616321000264:mmc1.docx]

**Supplementary Table 1:** Demographic features of patients with schizophrenia (Case) and healthy controls (Control).

| **Characteristics** | **Case**  **N = 71** | **Control**  **N = 88** | **Statistics**  **F/**χ2 ***P* value** |
| --- | --- | --- | --- |
| **Age (in years)**   - **All**   Years (Mean±SD)  Age Range   - **Male (Case: N=40/Control: N=35)**   Years (Mean±SD)  Age Range   - **Female (Case: N=31/Control: N=53)**   Years (Mean±SD)  Age Range | 37.74 ±10.14  21 - 57  38.00 ±10.44  21 - 57  37.37 ±9.95  24 - 56 | 34.46 ±7.10  21 - 56  38.79 ±8.91  22 - 56  33.02 ±7.63  21 - 54 | F = 5.667 0.06  F = 1.428 0.76  F = 4.049 0.07 |
| **Sex**   - **Male (%)** - **Female (%)** | 40 (56)  31 (44) | 35 (40)  53 (60) | χ2 = 0.430 **0.01*** |
| Handedness   - **All**   Right handed (%)  Left handed (%)   - **Male**   Right handed (%)  Left handed (%)   - **Female**   Right handed (%)  Left handed (%) | 64 (90)  7 (10)  39 (93)  3 (7)  25 (86)  4 (14) | 77 (88)  11 (12)  32 (94)  2 (6)  45 (83)  9 (17) | χ2 = 0.103 0.75  χ2 = 0059 0.84  χ2 = 2.584 0.77 |

* Significant

**Supplementary Table 2:** Primers sequences, and PCR product sizes for the selected SNP.

| **SNP ID** | **Primers** | **Sequence (5' to 3')** | **PCR Product size (BP)** |
| --- | --- | --- | --- |
| Rs6265 | Forward Inner  Reverse Inner  Forward Outer  Reverse Outer | 5'CTGGTCCTCATCCAACAGCTCTTCTATAAC3' (30mer)  5'ATCATTGGCTGACACTTTCGAACCCA3' (26mer)  5'ACTACTGAGCATCACCCTGGACGTGTAC3' (28mer)  5'AAAGAAGCAAACATCCGAGGACAAGG3' (26mer) | For allele C = 163  For allele T = 124  For outer = 231 |
